# Supplementary material
Source: PubMed Central journal article supplement (PMC4787645)
Supplement: sepi742908.ww1_default.pdf [file sepi742908.ww1_default.pdf]

## **Appendix**

### **Collaborators**

This study is a collaboration of Australian and New Zealand Intensive Care Society Clinical Trials Group (ANZICS-CTG), Australian and New Zealand Intensive Care Research Centre (ANZIC-RC), the Australasian Society of Infectious Diseases Clinical Trials Group (ASID CTG), the Paediatric Study Group of ANZICS (PSG) and the Australian and New Zealand Intensive Care Society Centre for Outcome and Resources Evaluation (ANZICS CORE), and the Australasian Maternity Outcomes Surveillance System (AMOSS).

### **Study writing committee**

Ian Seppelt (senior specialist and chair of writing committee, Nepean Hospital and Sydney Medical School—Nepean, Sydney), Elizabeth Sullivan (director, Perinatal and Reproductive Epidemiology Research Unit, School of Women's and Children's Health, University of New South Wales), Rinaldo Bellomo (professor, Australian and New Zealand Intensive Care Research Centre, Monash University, Melbourne), David Ellwood (dean, Australian National University and Department of Obstetrics and Gynaecology, Canberra Hospital), Simon Finfer (professorial fellow, George Institute for International Health, University of Sydney), Belinda Howe (research fellow, Australian and New Zealand Intensive Care Research Centre, Monash University), Marian Knight (director, National Perinatal Epidemiology Unit, University of Oxford), Colin McArthur (senior specialist, Department of Critical Care Medicine, Auckland City Hospital), Nolan McDonnell (senior specialist, Department of Anaesthesia and Pain Medicine, King Edward Memorial Hospital for Women, Perth, Western Australia, and the School of Women's and Infants' Health, University of Western Australia, Perth), Clare McLintock (senior specialist, Department of Women's Health, Auckland City Hospital), Thomas John Morgan (senior specialist, Adult Intensive Care Unit, Mater Health Services, Brisbane, Queensland, and School of Medicine, Anaesthesiology and Critical Care, University of Queensland, Brisbane), Siouzy Morrison (executive officer, Australian and New Zealand Intensive Care Research Centre, Monash University), Nhi Nguyen (staff specialist, Nepean Hospital and Sydney Medical School—Nepean, Sydney), Michael John Peek (dean, Sydney Medical School—Nepean), Wendy Pollock (project officer, Perinatal and Reproductive Epidemiology Research Unit, School of Women's and Children's Health, University of New South Wales, and Department of Nursing, University of

Melbourne), Geraldine Vaughan (project officer, Perinatal and Reproductive Epidemiology Research Unit, School of Women's and Children's Health, University of New South Wales), Yueping Alex Wang (biostatistician, Perinatal and Reproductive Epidemiology Research Unit, School of Women's and Children's Health, University of New South Wales), and Steven A R Web (senior specialist, Department of Intensive Care Medicine, Royal Perth Hospital, Western Australia, and School of Population Health and School of Medicine and Pharmacology, University of Western Australia, Perth)

#### **ANZIC Influenza Investigators Management Committee**

SAR Webb, V Pettilä, I Seppelt, R Bellomo, M Bailey, DJ Cooper, M Cretikos, AR Davies, S Finfer, PWJ Harrigan, GK Hart, B Howe, J Iredell, C McArthur, I Mitchell, S Morrison, A Nichol, DL Paterson, S Peake, B Richards, D Stephens, A Turner, M Yung

#### **AMOSS Chief Investigators**

E Sullivan, D Ellwood, C Homer, LJ Pulver, M Knight, MJ Peek; Associate Investigators: E Elliot, T Ho, N McDonnell, C McLintock, J Thompson, Y Zurynski; State Representatives: L Callaway, A Welsh, J Oats, B Gupta, W Hague; Project Team: W Pollock, G Vaughan, YA Wang

#### **Study site investigators**

(In alphabetical order—all in Australia unless specified to New Zealand, NZ):  
*ANZIC Research Centre, Melbourne, Vic* – B Howe, S Morrison, V Pettilä, *Auckland City Hospital Cardiovascular Intensive care Unit, Auckland, NZ* – A McKee, S McGuinness, R Parke, A Whitley. *Auckland City Hospital Department of Critical Care Medicine, Auckland, NZ* – C McArthur, L Newby, C Simmonds. *Austin and Repatriation Medical Centre, Melbourne, Vic* - R Bellomo, G Eastwood, L Peck. *Bendigo Hospital, Bendigo, Vic* – J Fletcher, C Boschert, J Smith. *Bankstown Hospital, Sydney, NSW* – G Bennett, L Ong. *Blacktown Hospital, Sydney, NSW* – K Nand, G Reece, T Sara. *Box Hill Hospital, Melbourne, Vic* - D Ernest, S Elliott, J Sidhu. *Cairns Base Hospital, Cairns, Qld* – A Carroll, S Richmond, D Wenck. *Campbelltown Hospital, Sydney, NSW* – G Bishop. *Canberra Hospital, Canberra, ACT* – R Ashley, E Crowfoot, I Mitchell. *Christchurch Hospital, Christchurch, NZ* – S Henderson, J Mehrtens. *Department of Health, NSW* – M Cretikos, J Fizzell, S Faithfull. *Flinders Medical Centre, Bedford Park, SA*– T Baynes, A Bersten, E Ryan, S Scroggs. *Fremantle Hospital, Fremantle, WA* – D Blythe, A Palermo. *Griffith Base*

*Hospital, Griffith, NSW – P Bortz, K Lodding, M Mott, S Vagg. Health Waikato, Waikato, NZ – R Frengley, A Haslam, M La Pine. King Edward Memorial Hospital for Women, Subiaco, Vic – T Bingham, D Cavill, B Jennings, N McDonnell, Liverpool Hospital, Liverpool, NSW – M Parr, S Micallef. Mater Adult Hospital, Brisbane, Qld – J Chaplin, K Gregory, TJ Morgan, J Presneill, J Sutton. Middlemore Hospital, Auckland, NZ – C Horsley, J Tai, A Tilsley. Monash Medical Centre, Melbourne, Vic – T Crozier, P Galt, M Reilly. Mount Isa Base Hospital, Mount Isa, Qld – J Rockell. Nepean Hospital, Penrith, NSW – L Hoyling, N Nguyen, I Seppelt, L Weisbrodt. North Shore Hospital, Auckland, NZ – J Bell, A Flanagan, J Laing. The Northern Hospital, Melbourne, Vic – G Duke, M Parkes. Orange Base Hospital, Orange, NSW – J Carr, J Lambert. Royal Brisbane Hospital, Brisbane, Qld – R Boots, L Callaway, M Lassig-Smith. Royal Darwin Hospital, Darwin, NT – J McLaine, D Stephens, J Thomas, S Winter. Royal Melbourne Hospital, Melbourne, Vic – D Barge, T Caf, N Harley, C MacIsaac. Royal North Shore Hospital, Sydney, NSW – S Bird, S Finfer, R Raper. Royal Perth Hospital, Perth, WA – J Chamberlain, A Gould, G McEntaggart, SAR. Webb. Royal Prince Alfred Hospital, Sydney, NSW – D Gattas, D Rajbhandari, C Rees. Sir Charles Gairdner Hospital, Nedlands, WA – S Baker, A Bicknell, B Roberts. St Vincent's Hospital, Sydney, NSW – P Nair, C Reynolds. Toowoomba Base Hospital, Toowoomba, Qld – J Evans. Townsville Hospital, Townsville, Qld – G Gordon, L Jones, S Radtke. Wellington Hospital, Wellington, NZ – L Andrews, R Elder, P Hicks, D Mackle. Westmead Hospital, Sydney, NSW – R Boyd, Y Mudaliar, V Nayyar, C Skelly, E Stachowski. Wollongong Hospital, Wollongong, NSW – M Sterba, B Johnson. Women and Children's Hospital, Adelaide, SA – W Hague, J Robinson*
